# Supplementary material
Source: Springer Nature journal article supplement (https://www.springermedizin.de/resource/supplementary/13012_2013_707_MOESM3_ESM.pdf/9630288)

percentage of referrals for psychological treatments

100.00  
80.00  
60.00  
40.00  
20.00  
0.00

MAY 2007  
JUL 2007  
SEP 2007  
NOV 2007  
JAN 2008  
MAR 2008  
MAY 2008  
JUL 2008  
SEP 2008  
NOV 2008  
JAN 2009  
MAR 2009  
MAY 2009  
JUL 2009  
SEP 2009  
NOV 2009  
JAN 2010  
MAR 2010  
MAY 2010  
JUL 2010  
SEP 2010  
NOV 2010  
JAN 2011  
MAR 2011  
MAY 2011  
JUL 2011  
SEP 2011  
NOV 2011  
JAN 2012

Date

1

2

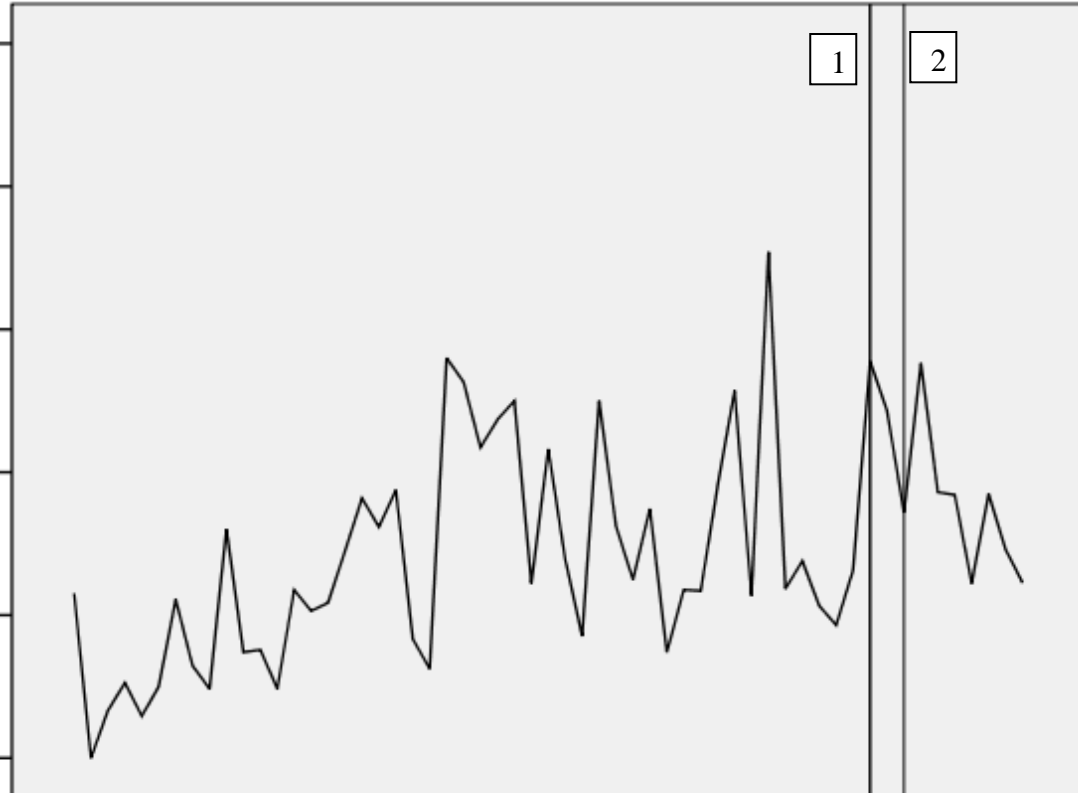

Supplement: MOESM3 [file 9630288]
